# Supplementary material for: Photoluminescent Lanthanide(III) Coordination Polymers with Bis(1,2,4-Triazol-1-yl)Methane Linker
Source: MDPI journal article supplement (doi:10.3390/inorganics11080317), 2023-07-27
Supplement: s1 [file s1]

## Supplementary Materials

### Photoluminescent lanthanide(III) coordination polymers with bis(1,2,4-triazol-1-yl)methane linker

Elizaveta A. Ivanova <sup>1</sup>, Ksenia S. Smirnova <sup>1</sup>, Ivan P. Pozdnyakov <sup>2</sup>, Andrei S. Potapov <sup>1,\*</sup> and Elizaveta V. Lider <sup>1,\*</sup>

<sup>1</sup> Nikolaev Institute of Inorganic Chemistry SB RAS, Novosibirsk 630090, Russia; ivanovaea@niic.nsc.ru (E.A.I.), smirnova@niic.nsc.ru (K.S.S.); potapov@niic.nsc.ru (A.S.P.); lider@niic.nsc.ru (E.V.L.)

<sup>2</sup> Voevodsky Institute of Chemical Kinetics and Combustion, SB RAS, Novosibirsk 630090, Russia; pozdnyak@kinetics.nsc.ru (I.P.P.)

\* Correspondence: potapov@niic.nsc.ru (A.S.P.), lider@niic.nsc.ru (E.V.L.)

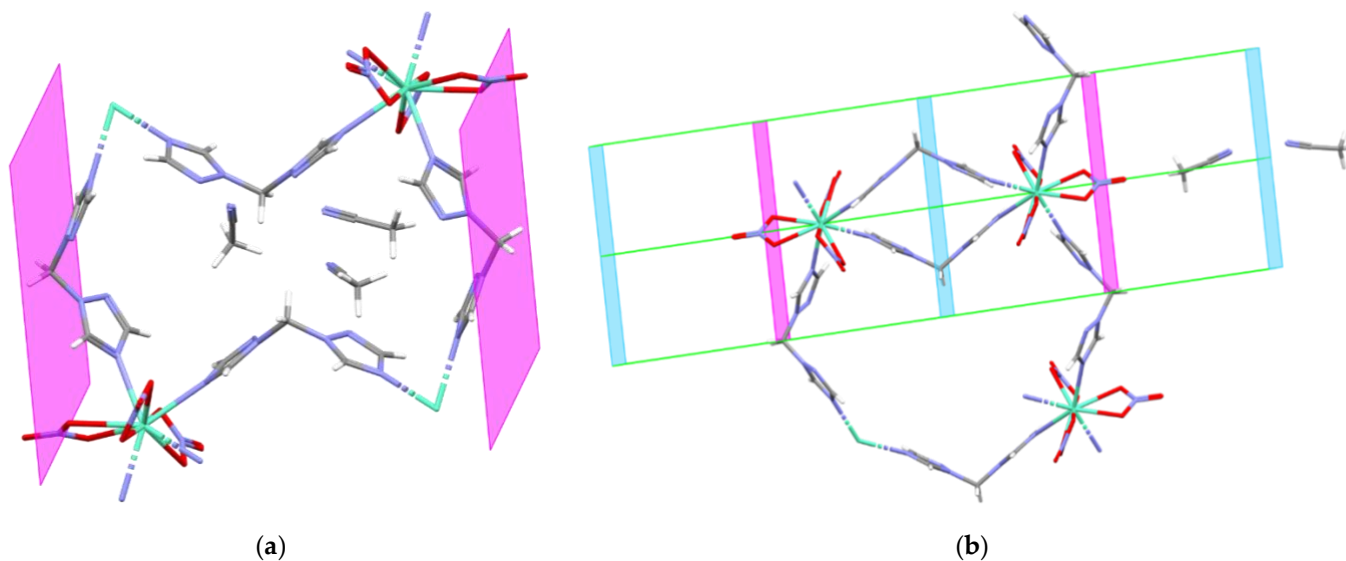

**Figure S1.** Selected symmetry elements in the crystal substructures of compound 1: (a)  $P2_1/n$  space group; (b)  $C2/m$  space group. Color code: purple – glide planes, blue – mirror planes, green – 2-fold axes.

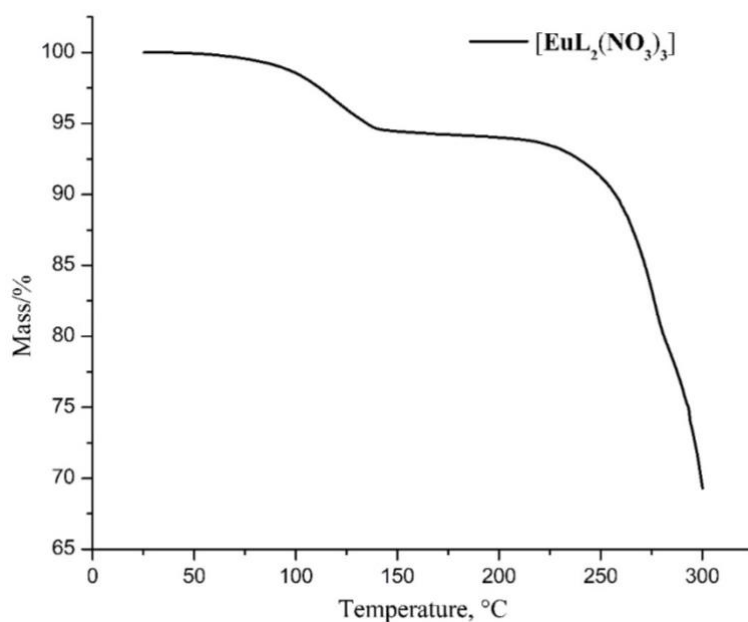

**Figure S2.** The thermogravimetric curve for compound 1.

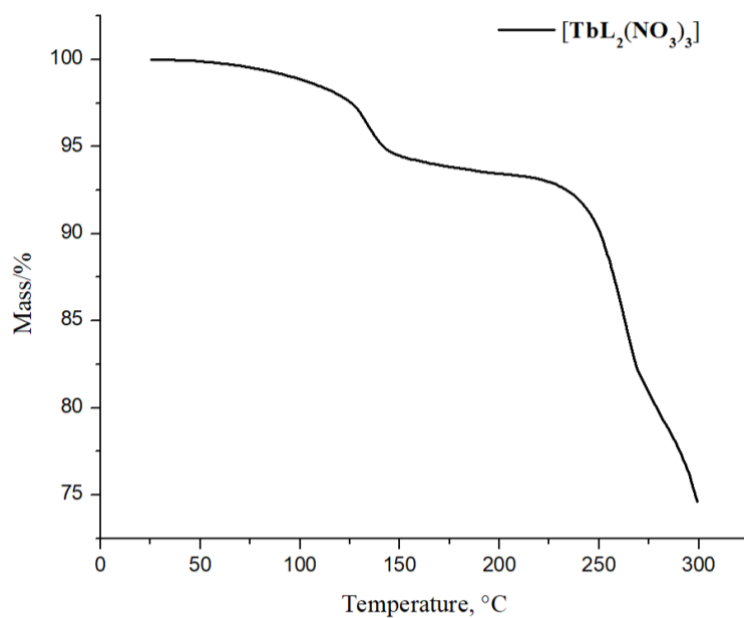

**Figure S3.** The thermogravimetric curve for compound 2.

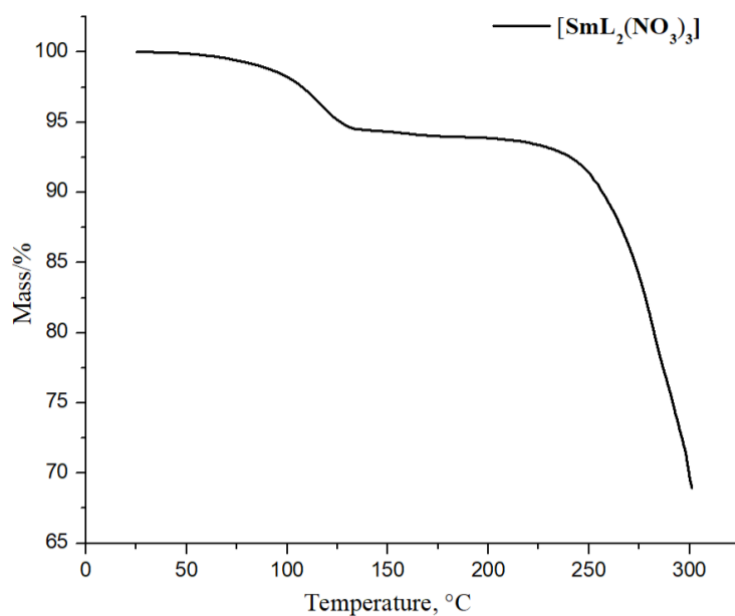

**Figure S4.** The thermogravimetric curve for compound 3.

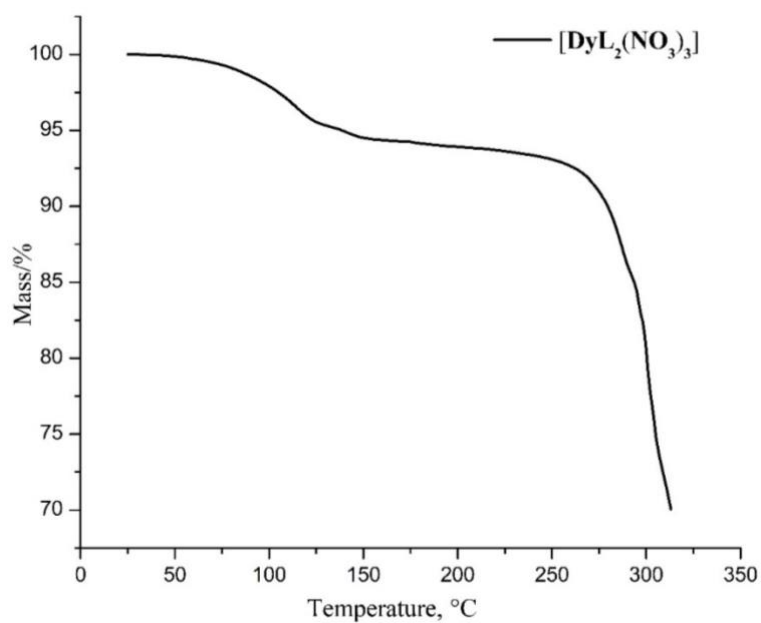

**Figure S5.** The thermogravimetric curve for compound 4.

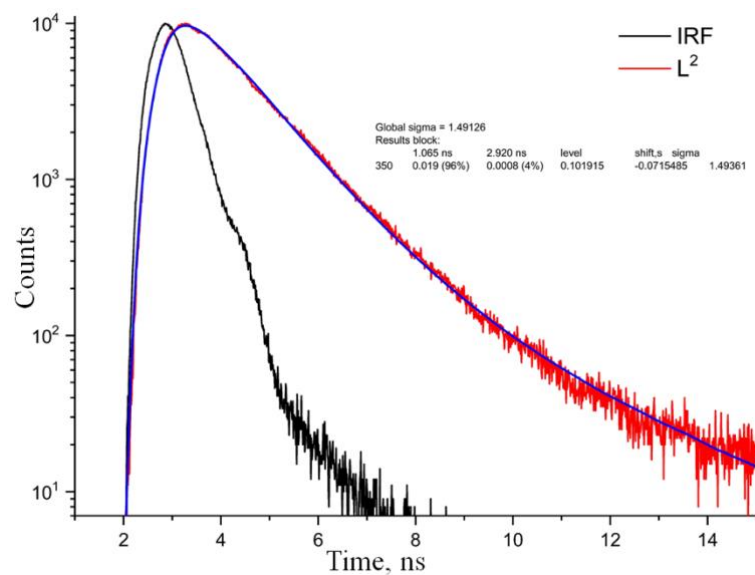

Figure S6. Luminescence decay plot for bis(1,2,4-triazol-1-yl)methane (btrm).

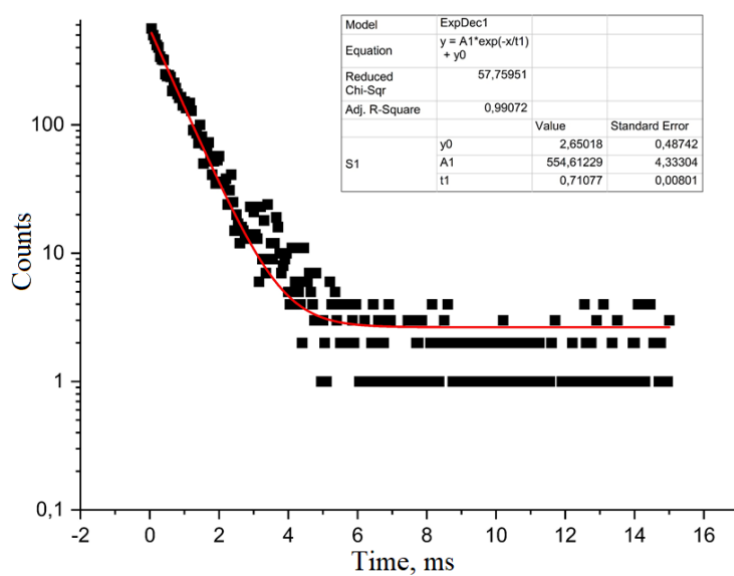

Figure S7. Luminescence decay plot for compound 1.

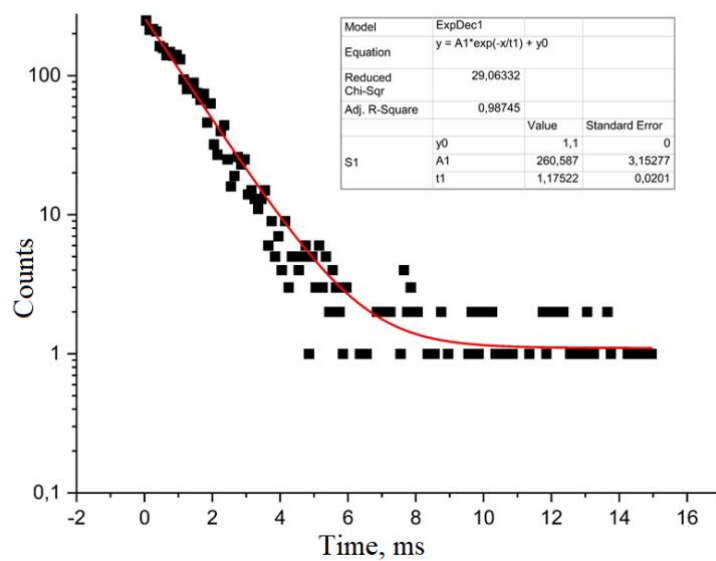

Figure S8. Luminescence decay plot for compound 2.

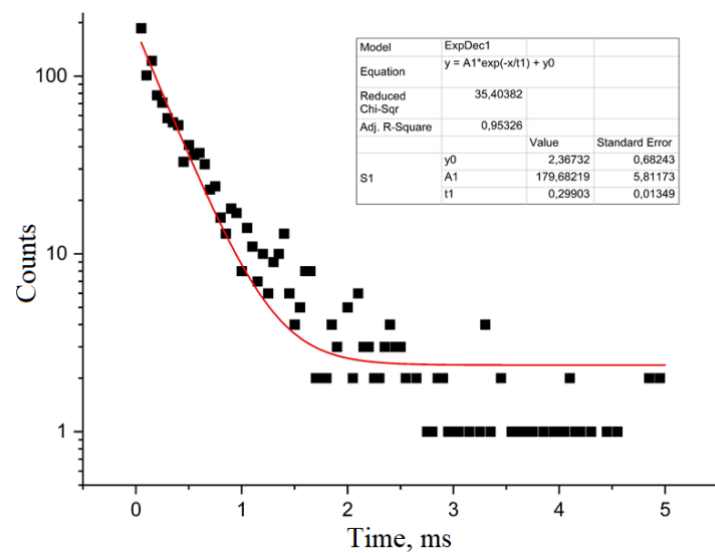

**Figure S9.** Luminescence decay plot for compound 3.

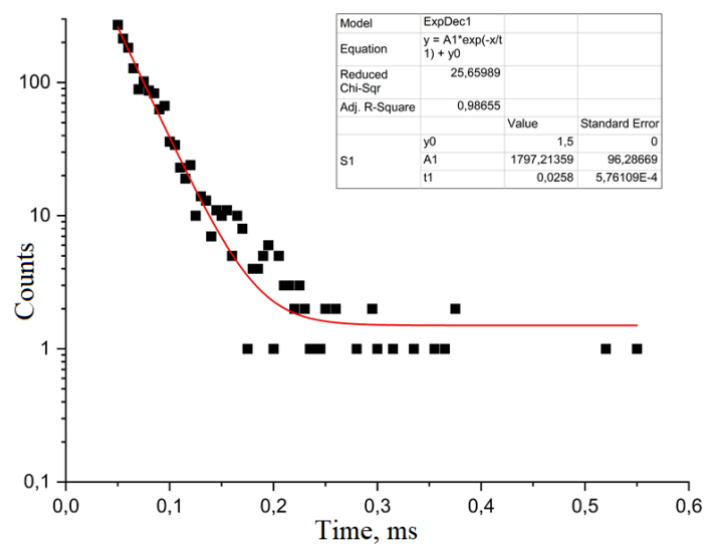

**Figure S10.** Luminescence decay plot for compound 4.

**Table S1.** Assignment of the IR bands (cm<sup>-1</sup>) of bis(1,2,4-triazol-1-yl)methane (btrm) and coordination polymers **1-5**

| Compound                                                                                         | $\nu(\text{O-H})$ | $\nu(\text{C-H})$                  | $\delta(\text{C-H})$                              | $\nu_{\text{ring}}$       | $\nu(\text{NO}_3^-)$ |
|--------------------------------------------------------------------------------------------------|-------------------|------------------------------------|---------------------------------------------------|---------------------------|----------------------|
| btrm                                                                                             | –                 | 3112, 3098,<br>3015, 2929,<br>2851 | 1463, 1421,<br>1379, 1204,<br>1132, 1076,<br>1019 | 1553, 1506,<br>1345, 1275 | –                    |
| [EuL <sub>2</sub> (NO <sub>3</sub> ) <sub>3</sub> ] <sub>n</sub> ·4H <sub>2</sub> O ( <b>1</b> ) | 3366              | 3125, 3055,<br>2925, 2855          | 1456, 1435,<br>1200, 1174,<br>1021                | 1560, 1557,<br>1275       | 1490, 1308           |
| [TbL <sub>2</sub> (NO <sub>3</sub> ) <sub>3</sub> ] <sub>n</sub> ·3H <sub>2</sub> O ( <b>2</b> ) | 3359              | 3124, 3056,<br>2923, 2857          | 1462, 1434,<br>1202, 1121,<br>1077, 1025          | 1538, 1518,<br>1275       | 1493, 1306           |
| [SmL <sub>2</sub> (NO <sub>3</sub> ) <sub>3</sub> ] <sub>n</sub> ·H <sub>2</sub> O ( <b>3</b> )  | 3362              | 3126, 3053                         | 1450, 1412,<br>1201, 1124,<br>1074 1023,          | 1536, 1511,<br>1275       | 1491, 1312           |
| [DyL <sub>2</sub> (NO <sub>3</sub> ) <sub>3</sub> ] <sub>n</sub> ·2H <sub>2</sub> O ( <b>4</b> ) | 3365              | 3127, 3053,<br>2929, 2851          | 1458, 1434,<br>1203, 1122,<br>1075, 1023          | 1538, 1518,<br>1275       | 1495, 1312           |
| [GdL <sub>2</sub> (NO <sub>3</sub> ) <sub>3</sub> ] <sub>n</sub> ·H <sub>2</sub> O ( <b>5</b> )  | 3363              | 3124, 3053,<br>2926, 2853          | 1456, 1435,<br>1202, 1121,<br>1075, 1025          | 1537, 1518,<br>1275       | 1493, 1308           |

**Table S2.** Crystallographic data and structure refinement details for the coordination polymers

| <b>Compound</b>                             | <b>1a</b>                                                         | <b>1b</b>                                                         | <b>2a</b>                                                         | <b>3a</b>                                                         | <b>4a</b>                                                         | <b>4b</b>                                                         |
|---------------------------------------------|-------------------------------------------------------------------|-------------------------------------------------------------------|-------------------------------------------------------------------|-------------------------------------------------------------------|-------------------------------------------------------------------|-------------------------------------------------------------------|
| Molecular formula                           | C <sub>16</sub> H <sub>21</sub> N <sub>18</sub> O <sub>9</sub> Eu | C <sub>16</sub> H <sub>21</sub> N <sub>18</sub> O <sub>9</sub> Eu | C <sub>10</sub> H <sub>12</sub> N <sub>15</sub> O <sub>9</sub> Tb | C <sub>16</sub> H <sub>21</sub> N <sub>18</sub> O <sub>9</sub> Sm | C <sub>16</sub> H <sub>21</sub> N <sub>18</sub> O <sub>9</sub> Dy | C <sub>16</sub> H <sub>21</sub> N <sub>18</sub> O <sub>9</sub> Dy |
| Formula weight                              | 761.47                                                            | 761.47                                                            | 645.27                                                            | 759.86                                                            | 772.01                                                            | 772.01                                                            |
| Crystal system, space group                 | Monoclinic, <i>P</i> 2 <sub>1</sub> / <i>n</i>                    | Monoclinic, <i>C</i> 2/ <i>m</i>                                  | Monoclinic, <i>C</i> 2/ <i>m</i>                                  | Monoclinic, <i>P</i> 2 <sub>1</sub> / <i>n</i>                    | Monoclinic, <i>P</i> 2 <sub>1</sub> / <i>n</i>                    | Monoclinic, <i>C</i> 2/ <i>m</i>                                  |
| Temperature (K)                             | 150                                                               | 150                                                               | 150                                                               | 150                                                               | 150                                                               | 150                                                               |
| <i>a</i> /Å                                 | 8.8102(7)                                                         | 11.6706(17)                                                       | 11.4936(5)                                                        | 8.8102(3)                                                         | 8.7580(5)                                                         | 11.6627(6)                                                        |
| <i>b</i> /Å                                 | 31.082(3)                                                         | 31.082(3)                                                         | 30.9476(11)                                                       | 31.0793(11)                                                       | 31.0161(14)                                                       | 31.0181(13)                                                       |
| <i>c</i> /Å                                 | 10.7758(9)                                                        | 8.8095(15)                                                        | 8.6690(4)                                                         | 10.7882(4)                                                        | 10.7149(5)                                                        | 8.7576(4)                                                         |
| $\beta$ /°                                  | 107.634(3)                                                        | 118.366(9)                                                        | 117.4440(10)                                                      | 107.7090(10)                                                      | 107.197(2)                                                        | 118.628(2)                                                        |
| Volume/Å <sup>3</sup>                       | 2812.2 (4)                                                        | 2811.9(7)                                                         | 2736.5(2)                                                         | 2813.99(17)                                                       | 2780.5(2)                                                         | 2780.8(2)                                                         |
| <i>Z</i>                                    | 4                                                                 | 4                                                                 | 4                                                                 | 4                                                                 | 4                                                                 | 4                                                                 |
| $\rho_{\text{calc}}$ g/cm <sup>3</sup>      | 1.799                                                             | 1.799                                                             | 1.566                                                             | 1.794                                                             | 1.844                                                             | 1.844                                                             |
| $\mu$ /mm <sup>-1</sup>                     | 2.310                                                             | 2.311                                                             | 2.647                                                             | 2.167                                                             | 2.768                                                             | 2.768                                                             |
| Crystal size/mm                             | 0.26×0.22×0.03                                                    | 0.26×0.22×0.03                                                    | 0.13×0.04×0.01                                                    | 0.24×0.11×0.02                                                    | 0.13×0.05×0.02                                                    | 0.13×0.05×0.02                                                    |
| 2 $\theta$ range for data collection/°      | 4.18 to 55.85                                                     | 4.18 to 55.83                                                     | 4.20 to 52.75                                                     | 4.17 to 61.11                                                     | 4.19 to 55.10                                                     | 4.19 to 54.19                                                     |
| Index ranges                                | -11 ≤ <i>h</i> ≤ 11                                               | -15 ≤ <i>h</i> ≤ 15                                               | -14 ≤ <i>h</i> ≤ 14                                               | -12 ≤ <i>h</i> ≤ 12                                               | -9 ≤ <i>h</i> ≤ 11                                                | -14 ≤ <i>h</i> ≤ 14                                               |
|                                             | -40 ≤ <i>k</i> ≤ 38                                               | -40 ≤ <i>k</i> ≤ 38                                               | -38 ≤ <i>k</i> ≤ 38                                               | -44 ≤ <i>k</i> ≤ 44                                               | -40 ≤ <i>k</i> ≤ 40                                               | -39 ≤ <i>k</i> ≤ 39                                               |
|                                             | -14 ≤ <i>l</i> ≤ 14                                               | -11 ≤ <i>l</i> ≤ 11                                               | -9 ≤ <i>l</i> ≤ 10                                                | -15 ≤ <i>l</i> ≤ 15                                               | -13 ≤ <i>l</i> ≤ 13                                               | -11 ≤ <i>l</i> ≤ 9                                                |
| Reflections collected                       | 39563                                                             | 20108                                                             | 16904                                                             | 54617                                                             | 28917                                                             | 14272                                                             |
| Independent reflections                     | 6715 [R <sub>int</sub> = 0.0523, R <sub>sigma</sub> = 0.0381]     | 3431 [R <sub>int</sub> = 0.0438, R <sub>sigma</sub> = 0.0321]     | 2861 [R <sub>int</sub> = 0.0637, R <sub>sigma</sub> = 0.0416]     | 8621 [R <sub>int</sub> = 0.0690, R <sub>sigma</sub> = 0.0524]     | 6382 [R <sub>int</sub> = 0.0592, R <sub>sigma</sub> = 0.0526]     | 3133 [R <sub>int</sub> = 0.0443, R <sub>sigma</sub> = 0.0391]     |
| Restraints/parameters                       | 0 / 400                                                           | 9 / 192                                                           | 0 / 139                                                           | 0 / 400                                                           | 8 / 385                                                           | 9 / 194                                                           |
| Goodness-of-fit on F <sup>2</sup>           | 1.125                                                             | 1.107                                                             | 1.083                                                             | 1.055                                                             | 1.056                                                             | 1.045                                                             |
| Final R indexes [I ≥ 2σ (I)]                | R <sub>1</sub> = 0.0405, wR <sub>2</sub> = 0.0903                 | R <sub>1</sub> = 0.0374, wR <sub>2</sub> = 0.0991                 | R <sub>1</sub> = 0.0452, wR <sub>2</sub> = 0.1228                 | R <sub>1</sub> = 0.0440, wR <sub>2</sub> = 0.1008                 | R <sub>1</sub> = 0.0500, wR <sub>2</sub> = 0.1228                 | R <sub>1</sub> = 0.0493, wR <sub>2</sub> = 0.1300                 |
| Final R indexes [all data]                  | R <sub>1</sub> = 0.0498, wR <sub>2</sub> = 0.0936                 | R <sub>1</sub> = 0.0445, wR <sub>2</sub> = 0.1032                 | R <sub>1</sub> = 0.0522, wR <sub>2</sub> = 0.1279                 | R <sub>1</sub> = 0.0713, wR <sub>2</sub> = 0.1102                 | R <sub>1</sub> = 0.0686, wR <sub>2</sub> = 0.1323                 | R <sub>1</sub> = 0.0648, wR <sub>2</sub> = 0.1422                 |
| Largest diff. peak/hole / e/Å <sup>-3</sup> | 1.47/-2.46                                                        | 1.54/-2.19                                                        | 1.31/-1.06                                                        | 1.61/-1.35                                                        | 3.35/-1.34                                                        | 1.56/-3.42                                                        |
| CCDC                                        | 2270135                                                           | 2270131                                                           | 2270136                                                           | 2270133                                                           | 2270134                                                           | 2270132                                                           |
